# Supplementary figures and images for: Operando57Fe Mössbauer and XRD investigation of LixMnyFe1-yPO4/C composites (y = 0.50; 0.75)
Source: Royal Society of Chemistry journal article supplement (doi:10.1039/c2ra20949g), 2012-01-01

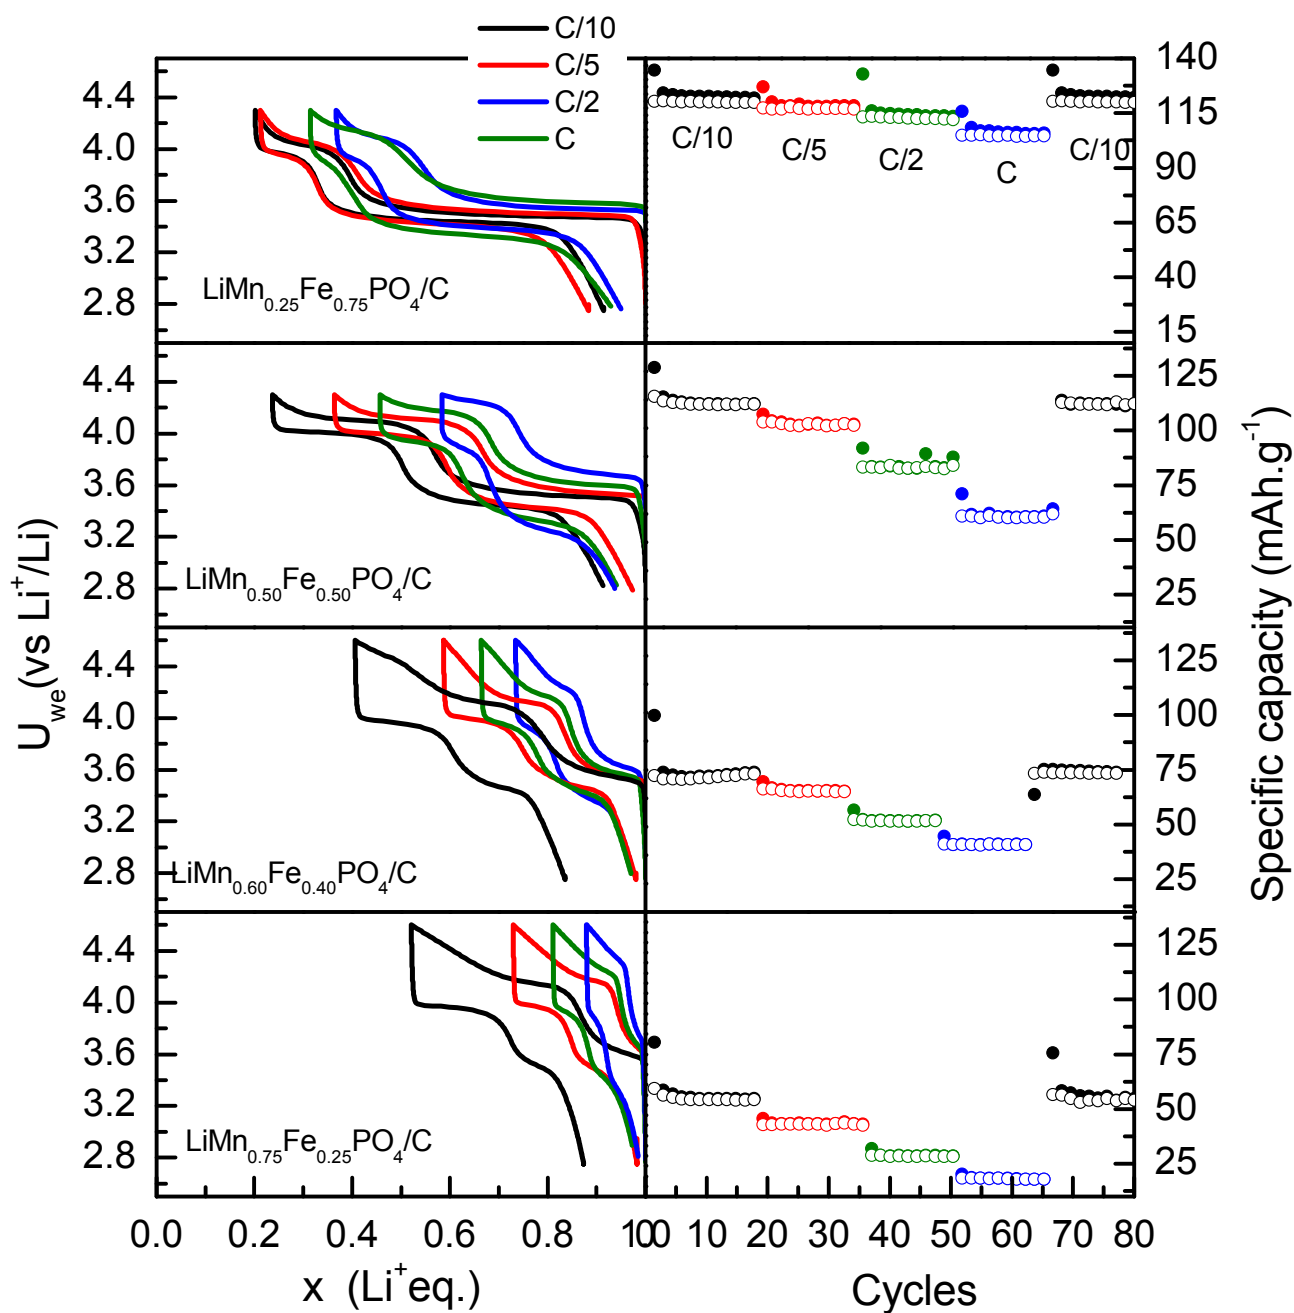

Electrochemical curves of  $\text{LiMn}_y\text{Fe}_{1-y}\text{PO}_4/\text{C}$

Supplement: c2ra20949g.pdf [file c2ra20949g.pdf]
